# Supplementary material
Source: PubMed Central journal article supplement (PMC8251655)
Supplement: jamaophthalmol-e212032-s002.pdf [file jamaophthalmol-e212032-s002.pdf]

| <b>*Group Name(s): IRIS Research Analytic Center Consortium</b> |                   |                              |                  |                                                        |                                          |                                                         |                                                                                            |  |  |  |
|-----------------------------------------------------------------|-------------------|------------------------------|------------------|--------------------------------------------------------|------------------------------------------|---------------------------------------------------------|--------------------------------------------------------------------------------------------|--|--|--|
| <b>*First Name and Middle Initial(s)</b>                        | <b>*Last Name</b> | <b>*Suffix (eg, Jr, III)</b> | Academic Degrees | Institution                                            | Location (city, state/province, country) | Role or Contribution, eg, chair, principal investigator | Group (if more than 1 Group listed in the byline) and/or Subgroup (eg, Steering Committee) |  |  |  |
| Flora                                                           | Lum               |                              | MD               | American Academy of Ophthalmology                      | San Francisco, CA, USA                   | Data analyses, manuscript                               | IRIS Research Analytic Center Consortium                                                   |  |  |  |
| Julia A.                                                        | Haller            |                              | MD               | Wills Eye Hospital                                     | Philadelphia, PA, USA                    | Data analyses, manuscript                               | IRIS Research Analytic Center Consortium                                                   |  |  |  |
| Leslie G.                                                       | Hyman             |                              | PhD              | Wills Eye Hospital                                     | Philadelphia, PA, USA                    | Data analyses, manuscript                               | IRIS Research Analytic Center Consortium                                                   |  |  |  |
| Alice C.                                                        | Lorch             |                              | MD, MPH          | Department of Ophthalmology, Massachusetts Eye and Ear | Boston, MA, USA                          | Data analyses, manuscript                               | IRIS Research Analytic Center Consortium                                                   |  |  |  |
| Joan W.                                                         | Miller            |                              | MD               | Department of Ophthalmology, Massachusetts Eye and Ear | Boston, MA, USA                          | Data analyses, manuscript                               | IRIS Research Analytic Center Consortium                                                   |  |  |  |
| Suzann                                                          | Pershing          |                              | MD               | Department of Ophthalmology, Stanford University       | Palo Alto, CA, USA                       | Data analyses, manuscript                               | IRIS Research Analytic Center Consortium                                                   |  |  |  |
